# Supplementary material
Source: publisher figshare collection journal article supplement (https://acs.figshare.com/ndownloader/files/5789904)
Supplement: Supplementary file 1 [file 5789904]

data_General 
_audit_creation_date                  'Mon Feb 17 01:46:16 2003'
_audit_creation_method                'by teXsan'
_audit_update_record                   ?
#------------------------------------------------------------------------------
# PROCESSING SUMMARY (IUCr Office Use Only) 
_journal_date_recd_electronic          ?
_journal_date_from_coeditor            ?
_journal_date_accepted                 ?
_journal_coeditor_code                 ?
#------------------------------------------------------------------------------
# SUBMISSION DETAILS 
_publ_contact_author_name             ' ENTER NAME'
_publ_contact_author_address
;
    ENTER ADDRESS
;
_publ_contact_author_email            ' ENTER EMAIL ADDRESS '
_publ_contact_author_fax              ' ENTER FAX NUMBER '
_publ_contact_author_phone            ' ENTER PHONE NUMBER '
_publ_contact_letter
;
    ENTER TEXT OF LETTER
;
_publ_requested_journal               ' ENTER JOURNAL NAME HERE'
_publ_requested_category              ' CHOOSE FI FM FO CI CM CO or AD'

_publ_requested_coeditor_name          ?
#------------------------------------------------------------------------------
# TITLE AND AUTHOR LIST 

_publ_section_title
;
    ENTER SECTION TITLE
;

_publ_section_title_footnote
;
    ENTER FOOTNOTE TO TITLE OF PAPER
;
loop_
_publ_author_name
_publ_author_footnote
_publ_author_address
' FIRST AUTHORS NAME '
;
  FIRST AUTHORS FOOTNOTES
;
;
  FIRST AUTHORS ADDRESS
;
_publ_section_synopsis
;
  ENTER SYNOPSIS
;
#------------------------------------------------------------------------------
# TEXT 

_publ_section_abstract
;
    ENTER ABSTRACT
;

_publ_section_comment
;
    ENTER TEXT
;

_publ_section_acknowledgements
;
    ENTER ACKNOWLEDGEMENTS
;

_publ_section_references
;
    ENTER OTHER REFERENCES
Molecular Structure Corporation, Rigaku Corporation. (2000). teXsan. 
Single Crystal Structure Analysis Software. Version 1.11.
MSC, 3200 Research Forest Drive, The Woodlands, TX 77381, USA.
Rigaku, 3-9-12 Akishima, Tokyo, Japan.
;

_publ_section_figure_captions
;
    ENTER FIGURE CAPTIONS
;

_publ_section_exptl_prep
;
    ENTER COMPOUND PREPARATION DETAILS
;

_publ_section_exptl_refinement
;
    ENTER SPECIAL DETAILS OF THE REFINEMENT
;
#------------------------------------------------------------------------------
data__wakui4

#------------------------------------------------------------------------------
# CHEMICAL DATA 
_chemical_formula_sum                  'C29 H28 O '
_chemical_formula_moiety               'C29 H28 O '
_chemical_formula_weight               392.54
_chemical_melting_point                ?
#------------------------------------------------------------------------------
# CRYSTAL DATA 
_symmetry_cell_setting                 triclinic
_symmetry_space_group_name_H-M        'P -1         '
_symmetry_Int_Tables_number            2
loop_
_symmetry_equiv_pos_as_xyz
x,y,z
-x,-y,-z
_cell_length_a                         10.222(10)
_cell_length_b                         10.812(9)
_cell_length_c                         12.050(9)
_cell_angle_alpha                      66.96(4)
_cell_angle_beta                       68.77(5)
_cell_angle_gamma                      83.88(6)
_cell_volume                           1141(1)
_cell_formula_units_Z                  2
_cell_measurement_reflns_used          2698
_cell_measurement_theta_min            3.5
_cell_measurement_theta_max            27.5
_cell_measurement_temperature          293.2
#------------------------------------------------------------------------------
_exptl_crystal_description            'Prism'
_exptl_crystal_colour                 'Colorless'
_exptl_crystal_size_max                0.200
_exptl_crystal_size_mid                0.200
_exptl_crystal_size_min                0.200
_exptl_crystal_size_rad                ?
_exptl_crystal_density_diffrn          1.142
_exptl_crystal_density_meas            ?
_exptl_crystal_density_method         'not measured'
_exptl_absorpt_coefficient_mu          0.067
_exptl_absorpt_correction_type         none
#------------------------------------------------------------------------------
# EXPERIMENTAL DATA 
_diffrn_radiation_type                'Mo K\a'
_diffrn_radiation_wavelength           0.7107
_diffrn_measurement_device_type       'Rigaku/MSC Mercury CCD'
_diffrn_measurement_method             \w
_diffrn_detector_area_resol_mean       14.62
_diffrn_reflns_number                  340
_diffrn_reflns_av_R_equivalents        0.077
_diffrn_reflns_theta_max               27.48
_diffrn_measured_fraction_theta_max    0.9409
_diffrn_reflns_theta_full              27.48
_diffrn_measured_fraction_theta_full   0.9409
_diffrn_reflns_limit_h_min             -13
_diffrn_reflns_limit_h_max             13
_diffrn_reflns_limit_k_min             -11
_diffrn_reflns_limit_k_max             14
_diffrn_reflns_limit_l_min             -15
_diffrn_reflns_limit_l_max             13
#------------------------------------------------------------------------------
# REFINEMENT DATA 
_refine_special_details
;
Refinement using reflections with F^2^ > -10.0 sigma(F^2^). The weighted 
R-factor (wR) and goodness of fit (S) are based on F^2^. R-factor (gt) are 
based on F. The threshold expression of F^2^ > 2.0 sigma(F^2^) is used only 
for calculating R-factor (gt).
;
_reflns_number_total                   4932
_reflns_number_gt                      3128
_reflns_threshold_expression           F^2^>2.0\s(F^2^)
_refine_ls_structure_factor_coef       Fsqd
_refine_ls_R_factor_gt                 0.0795
_refine_ls_wR_factor_ref               0.1859
_refine_ls_hydrogen_treatment          refxyz
_refine_ls_number_reflns               4932
_refine_ls_number_parameters           355
_refine_ls_goodness_of_fit_ref         1.671
_refine_ls_weighting_scheme            calc
_refine_ls_weighting_details
   'w = 1/[\s^2^(Fo^2^) + (0.05000(Max(Fo^2^,0) + 2Fc^2^)/3)^2^]'
_refine_ls_shift/su_max                0.0408
_refine_diff_density_max               0.31
_refine_diff_density_min               -0.28
_refine_ls_extinction_method           none
_refine_ls_extinction_coef             ?
_refine_ls_abs_structure_details       ?
_refine_ls_abs_structure_Flack         ?
loop_
_atom_type_symbol
_atom_type_description
_atom_type_scat_dispersion_real
_atom_type_scat_dispersion_imag
_atom_type_scat_source
  'C' 'C'  0.003 0.002 
;International Tables for Crystallography
(1992, Vol. C, Tables 4.2.6.8 and 6.1.1.1)
;
  'H' 'H'  0.000 0.000 
;International Tables for Crystallography
(1992, Vol. C, Table 6.1.1.2)
;
  'O' 'O'  0.011 0.006 
;International Tables for Crystallography
(1992, Vol. C, Tables 4.2.6.8 and 6.1.1.1)
;
#------------------------------------------------------------------------------
# ATOMIC COORDINATES AND DISPLACEMENT PARAMETERS 
loop_
_atom_site_label
_atom_site_type_symbol
_atom_site_fract_x
_atom_site_fract_y
_atom_site_fract_z
_atom_site_U_iso_or_equiv
_atom_site_adp_type
_atom_site_occupancy
_atom_site_calc_flag
_atom_site_refinement_flags
_atom_site_disorder_assembly
_atom_site_disorder_group
 O(1)   O  0.5441(2)   0.0648(2)   0.8611(2)   0.0626(5)   Uani 1.00 d . . .
 C(1)   C  0.5590(2)   0.3049(2)   0.7282(2)   0.0448(6)   Uani 1.00 d . . .
 C(2)   C  0.7039(2)   0.3156(2)   0.6984(2)   0.0446(6)   Uani 1.00 d . . .
 C(3)   C  0.8509(2)   0.1147(2)   0.6733(2)   0.0488(6)   Uani 1.00 d . . .
 C(4)   C  0.8552(2)   0.2016(2)   0.8307(2)   0.0496(6)   Uani 1.00 d . . .
 C(5)   C  0.8008(2)   0.2035(2)   0.7370(2)   0.0444(6)   Uani 1.00 d . . .
 C(6)   C  0.3464(3)   0.1910(3)   0.9232(3)   0.0659(8)   Uani 1.00 d . . .
 C(7)   C  0.7734(3)   0.4431(2)   0.6243(2)   0.0588(7)   Uani 1.00 d . . .
 C(8)   C  0.8081(3)   0.2266(3)   0.4652(2)   0.0620(8)   Uani 1.00 d . . .
 C(9)   C  0.4906(3)   0.4238(2)   0.6803(2)   0.0574(7)   Uani 1.00 d . . .
 C(10)  C  0.4650(2)   0.1764(2)   0.8091(2)   0.0493(6)   Uani 1.00 d . . .
 C(11)  C  0.9539(3)   0.0259(3)   0.7038(3)   0.0661(8)   Uani 1.00 d . . .
 C(12)  C  0.7373(3)   -0.0061(3)  0.5848(2)   0.0617(8)   Uani 1.00 d . . .
 C(13)  C  0.8045(2)   0.2933(2)   0.9021(2)   0.0508(7)   Uani 1.00 d . . .
 C(14)  C  0.7975(2)   0.1112(2)   0.5736(2)   0.0517(7)   Uani 1.00 d . . .
 C(15)  C  0.5608(3)   0.5472(3)   0.6075(3)   0.0704(9)   Uani 1.00 d . . .
 C(16)  C  0.7029(3)   0.5581(3)   0.5797(3)   0.0670(8)   Uani 1.00 d . . .
 C(17)  C  0.6695(3)   0.2727(3)   0.9924(2)   0.0634(8)   Uani 1.00 d . . .
 C(18)  C  0.4066(3)   0.1401(3)   0.7247(3)   0.0726(10)  Uani 1.00 d . . .
 C(19)  C  0.6888(3)   -0.0001(3)  0.4889(3)   0.0731(10)  Uani 1.00 d . . .
 C(20)  C  0.8907(3)   0.3973(3)   0.8818(3)   0.0700(9)   Uani 1.00 d . . .
 C(21)  C  0.9568(3)   0.1094(3)   0.8585(3)   0.0644(8)   Uani 1.00 d . . .
 C(22)  C  0.7604(3)   0.2301(3)   0.3700(3)   0.0728(9)   Uani 1.00 d . . .
 C(23)  C  1.0062(3)   0.0231(3)   0.7954(3)   0.0742(9)   Uani 1.00 d . . .
 C(24)  C  0.6984(3)   0.1155(4)   0.3839(3)   0.077(1)    Uani 1.00 d . . .
 C(25)  C  0.6187(4)   0.3572(4)   1.0588(3)   0.085(1)    Uani 1.00 d . . .
 C(26)  C  0.8350(5)   0.4806(3)   0.9517(4)   0.094(1)    Uani 1.00 d . . .
 C(27)  C  0.7021(5)   0.4593(4)   1.0377(4)   0.097(1)    Uani 1.00 d . . .
 C(28)  C  0.7210(5)   -0.1372(4)  0.6970(4)   0.103(1)    Uani 1.00 d . . .
 C(29)  C  1.0397(5)   0.4206(5)   0.7872(5)   0.115(2)    Uani 1.00 d . . .
 H(1)   H  0.511(3)    0.030(3)    0.933(3)    0.0839      Uiso 1.00 calc . . .
 H(2)   H  0.388(3)    0.215(3)    0.977(3)    0.0815      Uiso 1.00 calc . . .
 H(3)   H  0.282(3)    0.267(3)    0.894(2)    0.0815      Uiso 1.00 calc . . .
 H(4)   H  0.293(3)    0.108(3)    0.976(3)    0.0815      Uiso 1.00 calc . . .
 H(5)   H  0.881(3)    0.445(2)    0.604(2)    0.0731      Uiso 1.00 calc . . .
 H(6)   H  0.861(3)    0.306(3)    0.453(2)    0.0740      Uiso 1.00 calc . . .
 H(7)   H  0.388(3)    0.406(2)    0.702(2)    0.0704      Uiso 1.00 calc . . .
 H(8)   H  0.985(3)    -0.032(3)   0.657(3)    0.0797      Uiso 1.00 calc . . .
 H(9)   H  0.503(3)    0.628(3)    0.580(3)    0.0843      Uiso 1.00 calc . . .
 H(10)  H  0.752(3)    0.651(3)    0.522(3)    0.0816      Uiso 1.00 calc . . .
 H(11)  H  0.611(3)    0.202(3)    1.005(2)    0.0753      Uiso 1.00 calc . . .
 H(12)  H  0.345(3)    0.223(3)    0.694(3)    0.0887      Uiso 1.00 calc . . .
 H(13)  H  0.487(3)    0.125(3)    0.643(3)    0.0887      Uiso 1.00 calc . . .
 H(14)  H  0.350(3)    0.059(3)    0.782(3)    0.0887      Uiso 1.00 calc . . .
 H(15)  H  0.645(3)    -0.083(3)   0.501(3)    0.0895      Uiso 1.00 calc . . .
 H(16)  H  0.995(3)    0.107(2)    0.928(3)    0.0777      Uiso 1.00 calc . . .
 H(17)  H  0.775(3)    0.307(3)    0.293(3)    0.0902      Uiso 1.00 calc . . .
 H(18)  H  1.072(3)    -0.048(3)   0.820(3)    0.0911      Uiso 1.00 calc . . .
 H(19)  H  0.662(3)    0.122(3)    0.314(3)    0.0914      Uiso 1.00 calc . . .
 H(20)  H  0.531(4)    0.338(3)    1.114(3)    0.1044      Uiso 1.00 calc . . .
 H(21)  H  0.893(4)    0.559(4)    0.934(3)    0.1162      Uiso 1.00 calc . . .
 H(22)  H  0.670(4)    0.510(4)    1.085(4)    0.1206      Uiso 1.00 calc . . .
 H(23)  H  0.655(4)    -0.205(4)   0.700(4)    0.1337      Uiso 1.00 calc . . .
 H(24)  H  0.804(4)    -0.183(4)   0.671(4)    0.1337      Uiso 1.00 calc . . .
 H(25)  H  0.714(4)    -0.127(4)   0.774(4)    0.1337      Uiso 1.00 calc . . .
 H(26)  H  1.106(4)    0.444(4)    0.821(3)    0.1307      Uiso 1.00 calc . . .
 H(27)  H  1.058(4)    0.389(4)    0.722(4)    0.1307      Uiso 1.00 calc . . .
 H(28)  H  1.034(4)    0.517(4)    0.759(4)    0.1307      Uiso 1.00 calc . . .

loop_
_atom_site_aniso_label
_atom_site_aniso_U_11
_atom_site_aniso_U_22
_atom_site_aniso_U_33
_atom_site_aniso_U_12
_atom_site_aniso_U_13
_atom_site_aniso_U_23
 O(1)   0.055(1)    0.0502(10)  0.069(1)    0.0128(8)   -0.0181(9)  -0.0155(9) 
 C(1)   0.049(1)    0.049(1)    0.046(1)    0.0168(10)  -0.0230(10) -0.0259(10)
 C(2)   0.050(1)    0.045(1)    0.046(1)    0.0098(9)   -0.0214(10) -0.0222(9) 
 C(3)   0.044(1)    0.055(1)    0.049(1)    0.0106(10)  -0.0147(10) -0.025(1)  
 C(4)   0.045(1)    0.055(1)    0.051(1)    0.0089(10)  -0.020(1)   -0.022(1)  
 C(5)   0.040(1)    0.046(1)    0.046(1)    0.0065(9)   -0.0154(9)  -0.0182(9) 
 C(6)   0.054(2)    0.068(2)    0.071(2)    0.014(1)    -0.015(1)   -0.031(1)  
 C(7)   0.064(2)    0.055(1)    0.064(1)    0.005(1)    -0.027(1)   -0.025(1)  
 C(8)   0.069(2)    0.068(2)    0.061(2)    0.007(1)    -0.027(1)   -0.034(1)  
 C(9)   0.058(1)    0.060(1)    0.061(1)    0.021(1)    -0.028(1)   -0.027(1)  
 C(10)  0.044(1)    0.050(1)    0.058(1)    0.0140(10)  -0.021(1)   -0.025(1)  
 C(11)  0.059(2)    0.075(2)    0.075(2)    0.031(1)    -0.027(1)   -0.044(1)  
 C(12)  0.058(2)    0.064(2)    0.068(2)    0.007(1)    -0.013(1)   -0.040(1)  
 C(13)  0.055(1)    0.055(1)    0.054(1)    0.008(1)    -0.030(1)   -0.024(1)  
 C(14)  0.047(1)    0.058(1)    0.055(1)    0.012(1)    -0.015(1)   -0.032(1)  
 C(15)  0.088(2)    0.054(2)    0.070(2)    0.027(1)    -0.036(2)   -0.023(1)  
 C(16)  0.087(2)    0.047(1)    0.065(2)    0.006(1)    -0.029(1)   -0.019(1)  
 C(17)  0.065(2)    0.067(2)    0.062(2)    0.003(1)    -0.020(1)   -0.031(1)  
 C(18)  0.067(2)    0.080(2)    0.088(2)    0.007(2)    -0.036(2)   -0.043(2)  
 C(19)  0.064(2)    0.083(2)    0.091(2)    0.004(1)    -0.019(2)   -0.060(2)  
 C(20)  0.076(2)    0.073(2)    0.071(2)    -0.008(1)   -0.038(2)   -0.024(1)  
 C(21)  0.061(2)    0.078(2)    0.066(2)    0.024(1)    -0.037(1)   -0.032(1)  
 C(22)  0.083(2)    0.079(2)    0.074(2)    0.021(2)    -0.039(2)   -0.040(1)  
 C(23)  0.067(2)    0.088(2)    0.080(2)    0.040(1)    -0.039(2)   -0.042(2)  
 C(24)  0.066(2)    0.107(2)    0.093(2)    0.026(2)    -0.038(2)   -0.070(2)  
 C(25)  0.095(2)    0.092(2)    0.078(2)    0.018(2)    -0.023(2)   -0.051(2)  
 C(26)  0.133(3)    0.077(2)    0.101(3)    -0.006(2)   -0.061(3)   -0.042(2)  
 C(27)  0.137(4)    0.084(2)    0.103(3)    0.023(2)    -0.056(3)   -0.061(2)  
 C(28)  0.147(4)    0.069(2)    0.091(2)    -0.011(2)   -0.030(3)   -0.035(2)  
 C(29)  0.090(3)    0.131(3)    0.126(3)    -0.042(3)   -0.027(2)   -0.050(3)  
#------------------------------------------------------------------------------
_computing_data_collection            'CRYSTALCLEAR'
_computing_cell_refinement            'CRYSTALCLEAR'
_computing_data_reduction             'teXsan Ver. 1.11'
_computing_structure_solution          SIR92
_computing_structure_refinement       'teXsan Ver. 1.10'
_computing_publication_material       'teXsan Ver. 1.11'
_computing_molecular_graphics          ?
#------------------------------------------------------------------------------
_geom_special_details
;
 ?
;
loop_
_geom_bond_atom_site_label_1
_geom_bond_atom_site_label_2
_geom_bond_distance
_geom_bond_site_symmetry_1
_geom_bond_site_symmetry_2
_geom_bond_publ_flag
 O(1)      C(10)     1.439(3)   . . yes
 C(1)      C(2)      1.399(3)   . . yes
 C(1)      C(9)      1.412(3)   . . yes
 C(1)      C(10)     1.533(3)   . . yes
 C(2)      C(5)      1.517(3)   . . yes
 C(2)      C(7)      1.411(3)   . . yes
 C(3)      C(5)      1.401(3)   . . yes
 C(3)      C(11)     1.398(3)   . . yes
 C(3)      C(14)     1.502(3)   . . yes
 C(4)      C(5)      1.420(3)   . . yes
 C(4)      C(13)     1.492(3)   . . yes
 C(4)      C(21)     1.398(3)   . . yes
 C(6)      C(10)     1.519(3)   . . yes
 C(7)      C(16)     1.386(4)   . . yes
 C(8)      C(14)     1.388(3)   . . yes
 C(8)      C(22)     1.386(4)   . . yes
 C(9)      C(15)     1.377(4)   . . yes
 C(10)     C(18)     1.531(3)   . . yes
 C(11)     C(23)     1.379(4)   . . yes
 C(12)     C(14)     1.406(3)   . . yes
 C(12)     C(19)     1.390(4)   . . yes
 C(12)     C(28)     1.500(4)   . . yes
 C(13)     C(17)     1.388(4)   . . yes
 C(13)     C(20)     1.393(3)   . . yes
 C(15)     C(16)     1.374(4)   . . yes
 C(17)     C(25)     1.385(4)   . . yes
 C(19)     C(24)     1.368(4)   . . yes
 C(20)     C(26)     1.408(4)   . . yes
 C(20)     C(29)     1.511(5)   . . yes
 C(21)     C(23)     1.372(4)   . . yes
 C(22)     C(24)     1.376(4)   . . yes
 C(25)     C(27)     1.354(5)   . . yes
 C(26)     C(27)     1.354(5)   . . yes
#------------------------------------------------------------------------------
loop_
_geom_angle_atom_site_label_1
_geom_angle_atom_site_label_2
_geom_angle_atom_site_label_3
_geom_angle
_geom_angle_site_symmetry_1
_geom_angle_site_symmetry_2
_geom_angle_site_symmetry_3
_geom_angle_publ_flag
   C(2)      C(1)      C(9)      117.5(2)   . . . yes
   C(2)      C(1)      C(10)     126.6(2)   . . . yes
   C(9)      C(1)      C(10)     115.9(2)   . . . yes
   C(1)      C(2)      C(5)      127.6(2)   . . . yes
   C(1)      C(2)      C(7)      118.9(2)   . . . yes
   C(5)      C(2)      C(7)      113.5(2)   . . . yes
   C(5)      C(3)      C(11)     118.8(2)   . . . yes
   C(5)      C(3)      C(14)     122.3(2)   . . . yes
   C(11)     C(3)      C(14)     118.8(2)   . . . yes
   C(5)      C(4)      C(13)     121.8(2)   . . . yes
   C(5)      C(4)      C(21)     119.1(2)   . . . yes
   C(13)     C(4)      C(21)     119.2(2)   . . . yes
   C(2)      C(5)      C(3)      122.6(2)   . . . yes
   C(2)      C(5)      C(4)      117.3(2)   . . . yes
   C(3)      C(5)      C(4)      119.6(2)   . . . yes
   C(2)      C(7)      C(16)     122.2(2)   . . . yes
   C(14)     C(8)      C(22)     122.5(3)   . . . yes
   C(1)      C(9)      C(15)     122.6(3)   . . . yes
   O(1)      C(10)     C(1)      110.7(2)   . . . yes
   O(1)      C(10)     C(6)      106.6(2)   . . . yes
   O(1)      C(10)     C(18)     107.2(2)   . . . yes
   C(1)      C(10)     C(6)      111.5(2)   . . . yes
   C(1)      C(10)     C(18)     110.0(2)   . . . yes
   C(6)      C(10)     C(18)     110.7(2)   . . . yes
   C(3)      C(11)     C(23)     121.7(2)   . . . yes
   C(14)     C(12)     C(19)     118.7(3)   . . . yes
   C(14)     C(12)     C(28)     122.8(3)   . . . yes
   C(19)     C(12)     C(28)     118.5(3)   . . . yes
   C(4)      C(13)     C(17)     119.2(2)   . . . yes
   C(4)      C(13)     C(20)     121.4(2)   . . . yes
   C(17)     C(13)     C(20)     119.4(2)   . . . yes
   C(3)      C(14)     C(8)      119.7(2)   . . . yes
   C(3)      C(14)     C(12)     122.5(2)   . . . yes
   C(8)      C(14)     C(12)     117.8(2)   . . . yes
   C(9)      C(15)     C(16)     120.0(3)   . . . yes
   C(7)      C(16)     C(15)     118.9(2)   . . . yes
   C(13)     C(17)     C(25)     120.5(3)   . . . yes
   C(12)     C(19)     C(24)     122.4(3)   . . . yes
   C(13)     C(20)     C(26)     118.2(3)   . . . yes
   C(13)     C(20)     C(29)     121.1(3)   . . . yes
   C(26)     C(20)     C(29)     120.7(3)   . . . yes
   C(4)      C(21)     C(23)     121.2(2)   . . . yes
   C(8)      C(22)     C(24)     119.0(3)   . . . yes
   C(11)     C(23)     C(21)     119.6(2)   . . . yes
   C(19)     C(24)     C(22)     119.6(3)   . . . yes
   C(17)     C(25)     C(27)     119.8(3)   . . . yes
   C(20)     C(26)     C(27)     121.0(3)   . . . yes
   C(25)     C(27)     C(26)     121.0(3)   . . . yes
#------------------------------------------------------------------------------
loop_
_geom_torsion_atom_site_label_1
_geom_torsion_atom_site_label_2
_geom_torsion_atom_site_label_3
_geom_torsion_atom_site_label_4
_geom_torsion
_geom_torsion_site_symmetry_1
_geom_torsion_site_symmetry_2
_geom_torsion_site_symmetry_3
_geom_torsion_site_symmetry_4
_geom_torsion_publ_flag
 O(1)      C(10)     C(1)      C(2)      4.5(3)     . . . . yes
 O(1)      C(10)     C(1)      C(9)      -175.2(2)  . . . . yes
 C(1)      C(2)      C(5)      C(3)      79.3(3)    . . . . yes
 C(1)      C(2)      C(5)      C(4)      -108.8(2)  . . . . yes
 C(1)      C(2)      C(7)      C(16)     -0.3(3)    . . . . yes
 C(1)      C(9)      C(15)     C(16)     -0.4(4)    . . . . yes
 C(2)      C(1)      C(9)      C(15)     -0.5(3)    . . . . yes
 C(2)      C(1)      C(10)     C(6)      122.9(2)   . . . . yes
 C(2)      C(1)      C(10)     C(18)     -113.9(2)  . . . . yes
 C(2)      C(5)      C(3)      C(11)     171.7(2)   . . . . yes
 C(2)      C(5)      C(3)      C(14)     -8.5(3)    . . . . yes
 C(2)      C(5)      C(4)      C(13)     8.4(3)     . . . . yes
 C(2)      C(5)      C(4)      C(21)     -172.9(2)  . . . . yes
 C(2)      C(7)      C(16)     C(15)     -0.7(4)    . . . . yes
 C(3)      C(5)      C(2)      C(7)      -100.9(2)  . . . . yes
 C(3)      C(5)      C(4)      C(13)     -179.5(2)  . . . . yes
 C(3)      C(5)      C(4)      C(21)     -0.8(3)    . . . . yes
 C(3)      C(11)     C(23)     C(21)     -0.2(5)    . . . . yes
 C(3)      C(14)     C(8)      C(22)     -179.7(2)  . . . . yes
 C(3)      C(14)     C(12)     C(19)     179.2(2)   . . . . yes
 C(3)      C(14)     C(12)     C(28)     0.1(4)     . . . . yes
 C(4)      C(5)      C(2)      C(7)      71.0(2)    . . . . yes
 C(4)      C(5)      C(3)      C(11)     0.0(3)     . . . . yes
 C(4)      C(5)      C(3)      C(14)     179.8(2)   . . . . yes
 C(4)      C(13)     C(17)     C(25)     -179.1(2)  . . . . yes
 C(4)      C(13)     C(20)     C(26)     179.3(2)   . . . . yes
 C(4)      C(13)     C(20)     C(29)     -0.6(4)    . . . . yes
 C(4)      C(21)     C(23)     C(11)     -0.7(4)    . . . . yes
 C(5)      C(2)      C(1)      C(9)      -179.4(2)  . . . . yes
 C(5)      C(2)      C(1)      C(10)     0.9(3)     . . . . yes
 C(5)      C(2)      C(7)      C(16)     180.0(2)   . . . . yes
 C(5)      C(3)      C(11)     C(23)     0.5(4)     . . . . yes
 C(5)      C(3)      C(14)     C(8)      58.1(3)    . . . . yes
 C(5)      C(3)      C(14)     C(12)     -122.5(2)  . . . . yes
 C(5)      C(4)      C(13)     C(17)     69.9(3)    . . . . yes
 C(5)      C(4)      C(13)     C(20)     -111.3(3)  . . . . yes
 C(5)      C(4)      C(21)     C(23)     1.2(4)     . . . . yes
 C(6)      C(10)     C(1)      C(9)      -56.8(3)   . . . . yes
 C(7)      C(2)      C(1)      C(9)      0.8(3)     . . . . yes
 C(7)      C(2)      C(1)      C(10)     -178.9(2)  . . . . yes
 C(7)      C(16)     C(15)     C(9)      1.0(4)     . . . . yes
 C(8)      C(14)     C(3)      C(11)     -122.1(3)  . . . . yes
 C(8)      C(14)     C(12)     C(19)     -1.4(3)    . . . . yes
 C(8)      C(14)     C(12)     C(28)     179.6(3)   . . . . yes
 C(8)      C(22)     C(24)     C(19)     -1.9(4)    . . . . yes
 C(9)      C(1)      C(10)     C(18)     66.4(3)    . . . . yes
 C(10)     C(1)      C(9)      C(15)     179.2(2)   . . . . yes
 C(11)     C(3)      C(14)     C(12)     57.4(3)    . . . . yes
 C(12)     C(14)     C(8)      C(22)     0.8(4)     . . . . yes
 C(12)     C(19)     C(24)     C(22)     1.3(4)     . . . . yes
 C(13)     C(4)      C(21)     C(23)     179.9(2)   . . . . yes
 C(13)     C(17)     C(25)     C(27)     -1.3(5)    . . . . yes
 C(13)     C(20)     C(26)     C(27)     0.9(5)     . . . . yes
 C(14)     C(3)      C(11)     C(23)     -179.3(3)  . . . . yes
 C(14)     C(8)      C(22)     C(24)     0.9(4)     . . . . yes
 C(14)     C(12)     C(19)     C(24)     0.4(4)     . . . . yes
 C(17)     C(13)     C(4)      C(21)     -108.8(3)  . . . . yes
 C(17)     C(13)     C(20)     C(26)     -1.9(4)    . . . . yes
 C(17)     C(13)     C(20)     C(29)     178.2(3)   . . . . yes
 C(17)     C(25)     C(27)     C(26)     0.3(5)     . . . . yes
 C(20)     C(13)     C(4)      C(21)     70.0(3)    . . . . yes
 C(20)     C(13)     C(17)     C(25)     2.1(4)     . . . . yes
 C(20)     C(26)     C(27)     C(25)     -0.1(6)    . . . . yes
 C(24)     C(19)     C(12)     C(28)     179.5(3)   . . . . yes
 C(27)     C(26)     C(20)     C(29)     -179.2(4)  . . . . yes
 C(27)     C(26)     C(20)     C(29)     -179.2(4)  . . . . yes
#------------------------------------------------------------------------------
loop_
_geom_contact_atom_site_label_1
_geom_contact_atom_site_label_2
_geom_contact_distance
_geom_contact_site_symmetry_1
_geom_contact_site_symmetry_2
_geom_contact_publ_flag
 O(1)      O(1)      2.898(4)   . 2_657 ?
 O(1)      C(6)      3.388(4)   . 2_657 ?
 C(9)      C(15)     3.583(4)   . 2_666 ?
 C(11)     C(19)     3.599(5)   . 2_756 ?
 C(23)     C(24)     3.588(4)   . 2_756 ?
#------------------------------------------------------------------------------
#------------------------------------------------------------------------------
